# Supplementary material for: Nitrogen and chlorine co-doped carbon dots with synchronous excitation of multiple luminescence centers for blue-white emission
Source: Royal Society of Chemistry journal article supplement (doi:10.1039/d1nj00951f), 2021-01-01
Supplement: d1nj00951f4.pdf [file d1nj00951f4.pdf]

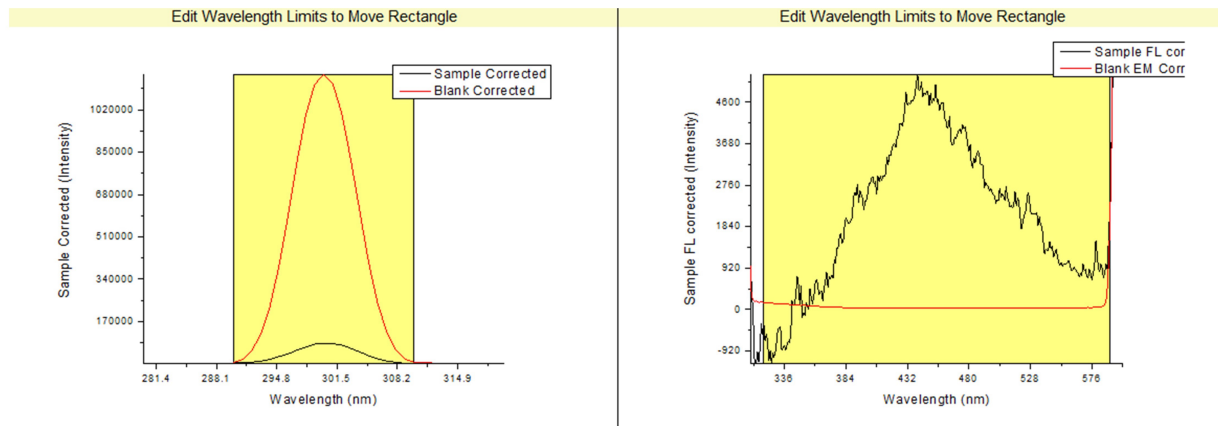

| Excitation / Scatter            |           |            | Emission / Fluorescence         |           |           |
|---------------------------------|-----------|------------|---------------------------------|-----------|-----------|
| Enter Start and End Wavelengths |           |            | Enter Start and End Wavelengths |           |           |
| Start Wavelength                | 290.010   | #####      | Start Wavelength                | 320.000   |           |
| End Wavelength                  | 310.010   | 1          | End Wavelength                  | 590.000   |           |
| Area                            |           | Err        | Area                            |           | Err       |
| La                              | 720191.92 | 848.64122  | Ea                              | 568075.11 | 753.70758 |
| Lc                              | 9.90E+06  | 3145.72721 | Ec                              | 15840.43  | 125.85877 |

Sample Source  
DfItEm3G

**Quantum Yield 6.02**

Abs Error? 0.010  
 Relative Err ? 0.00159

**HORIBA** Blank Source  
DfItEm2G
