# Supplementary figures and images for: Nitrogen and chlorine co-doped carbon dots with synchronous excitation of multiple luminescence centers for blue-white emission
Source: Royal Society of Chemistry journal article supplement (doi:10.1039/d1nj00951f), 2021-01-01

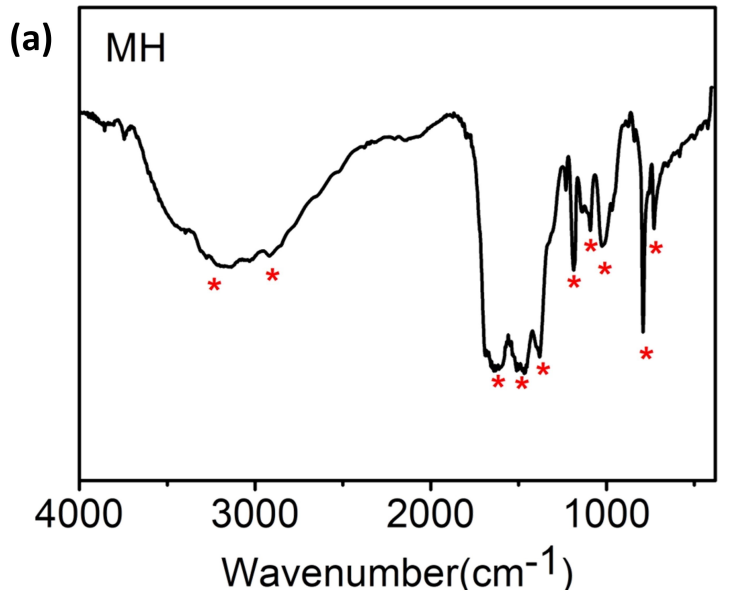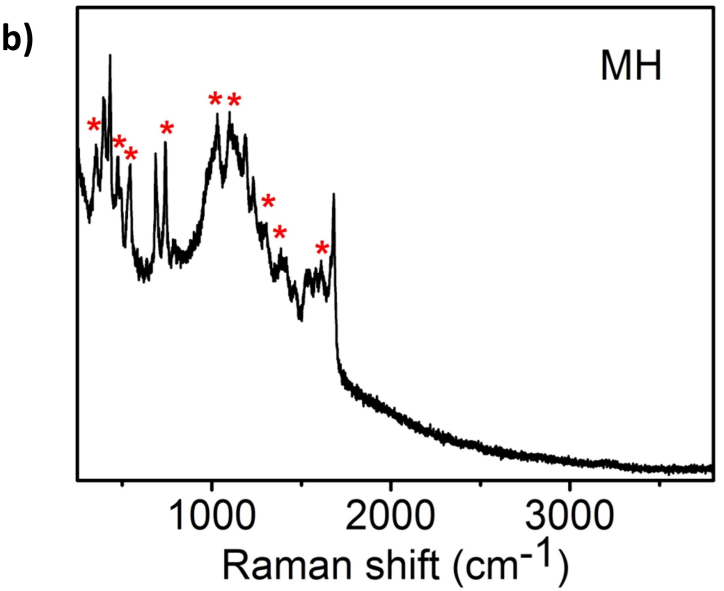

Supplement: d1nj00951f2.pdf [file d1nj00951f2.pdf]

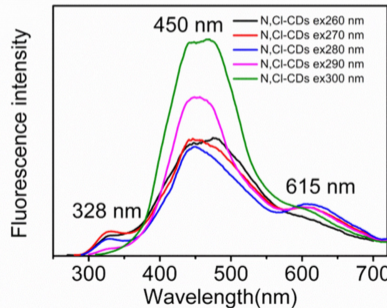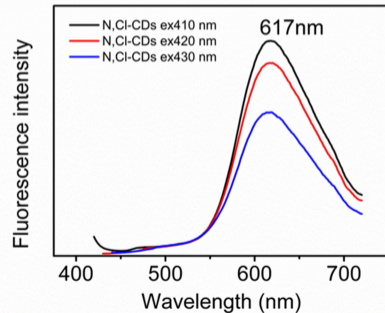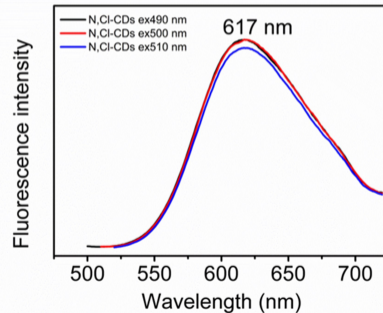

Supplement: d1nj00951f3.pdf [file d1nj00951f3.pdf]

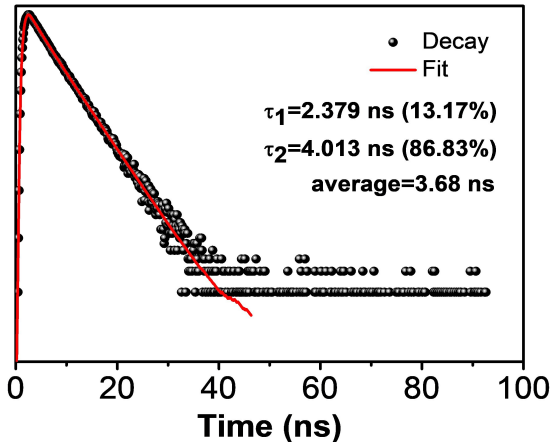

Supplement: d1nj00951f5.pdf [file d1nj00951f5.pdf]

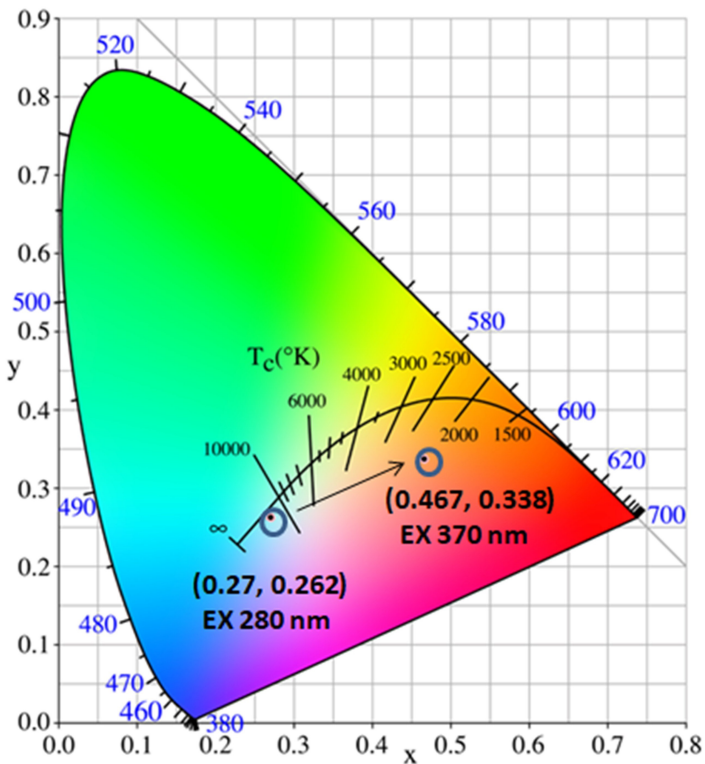

Supplement: d1nj00951f6.pdf [file d1nj00951f6.pdf]
